# Supplementary material
Source: publisher site journal article supplement (https://www.dovepress.com/article/499986)
Supplement: Supplementary file 1 [file get_supplementary_file.php]

**Supplementary Materials**

**
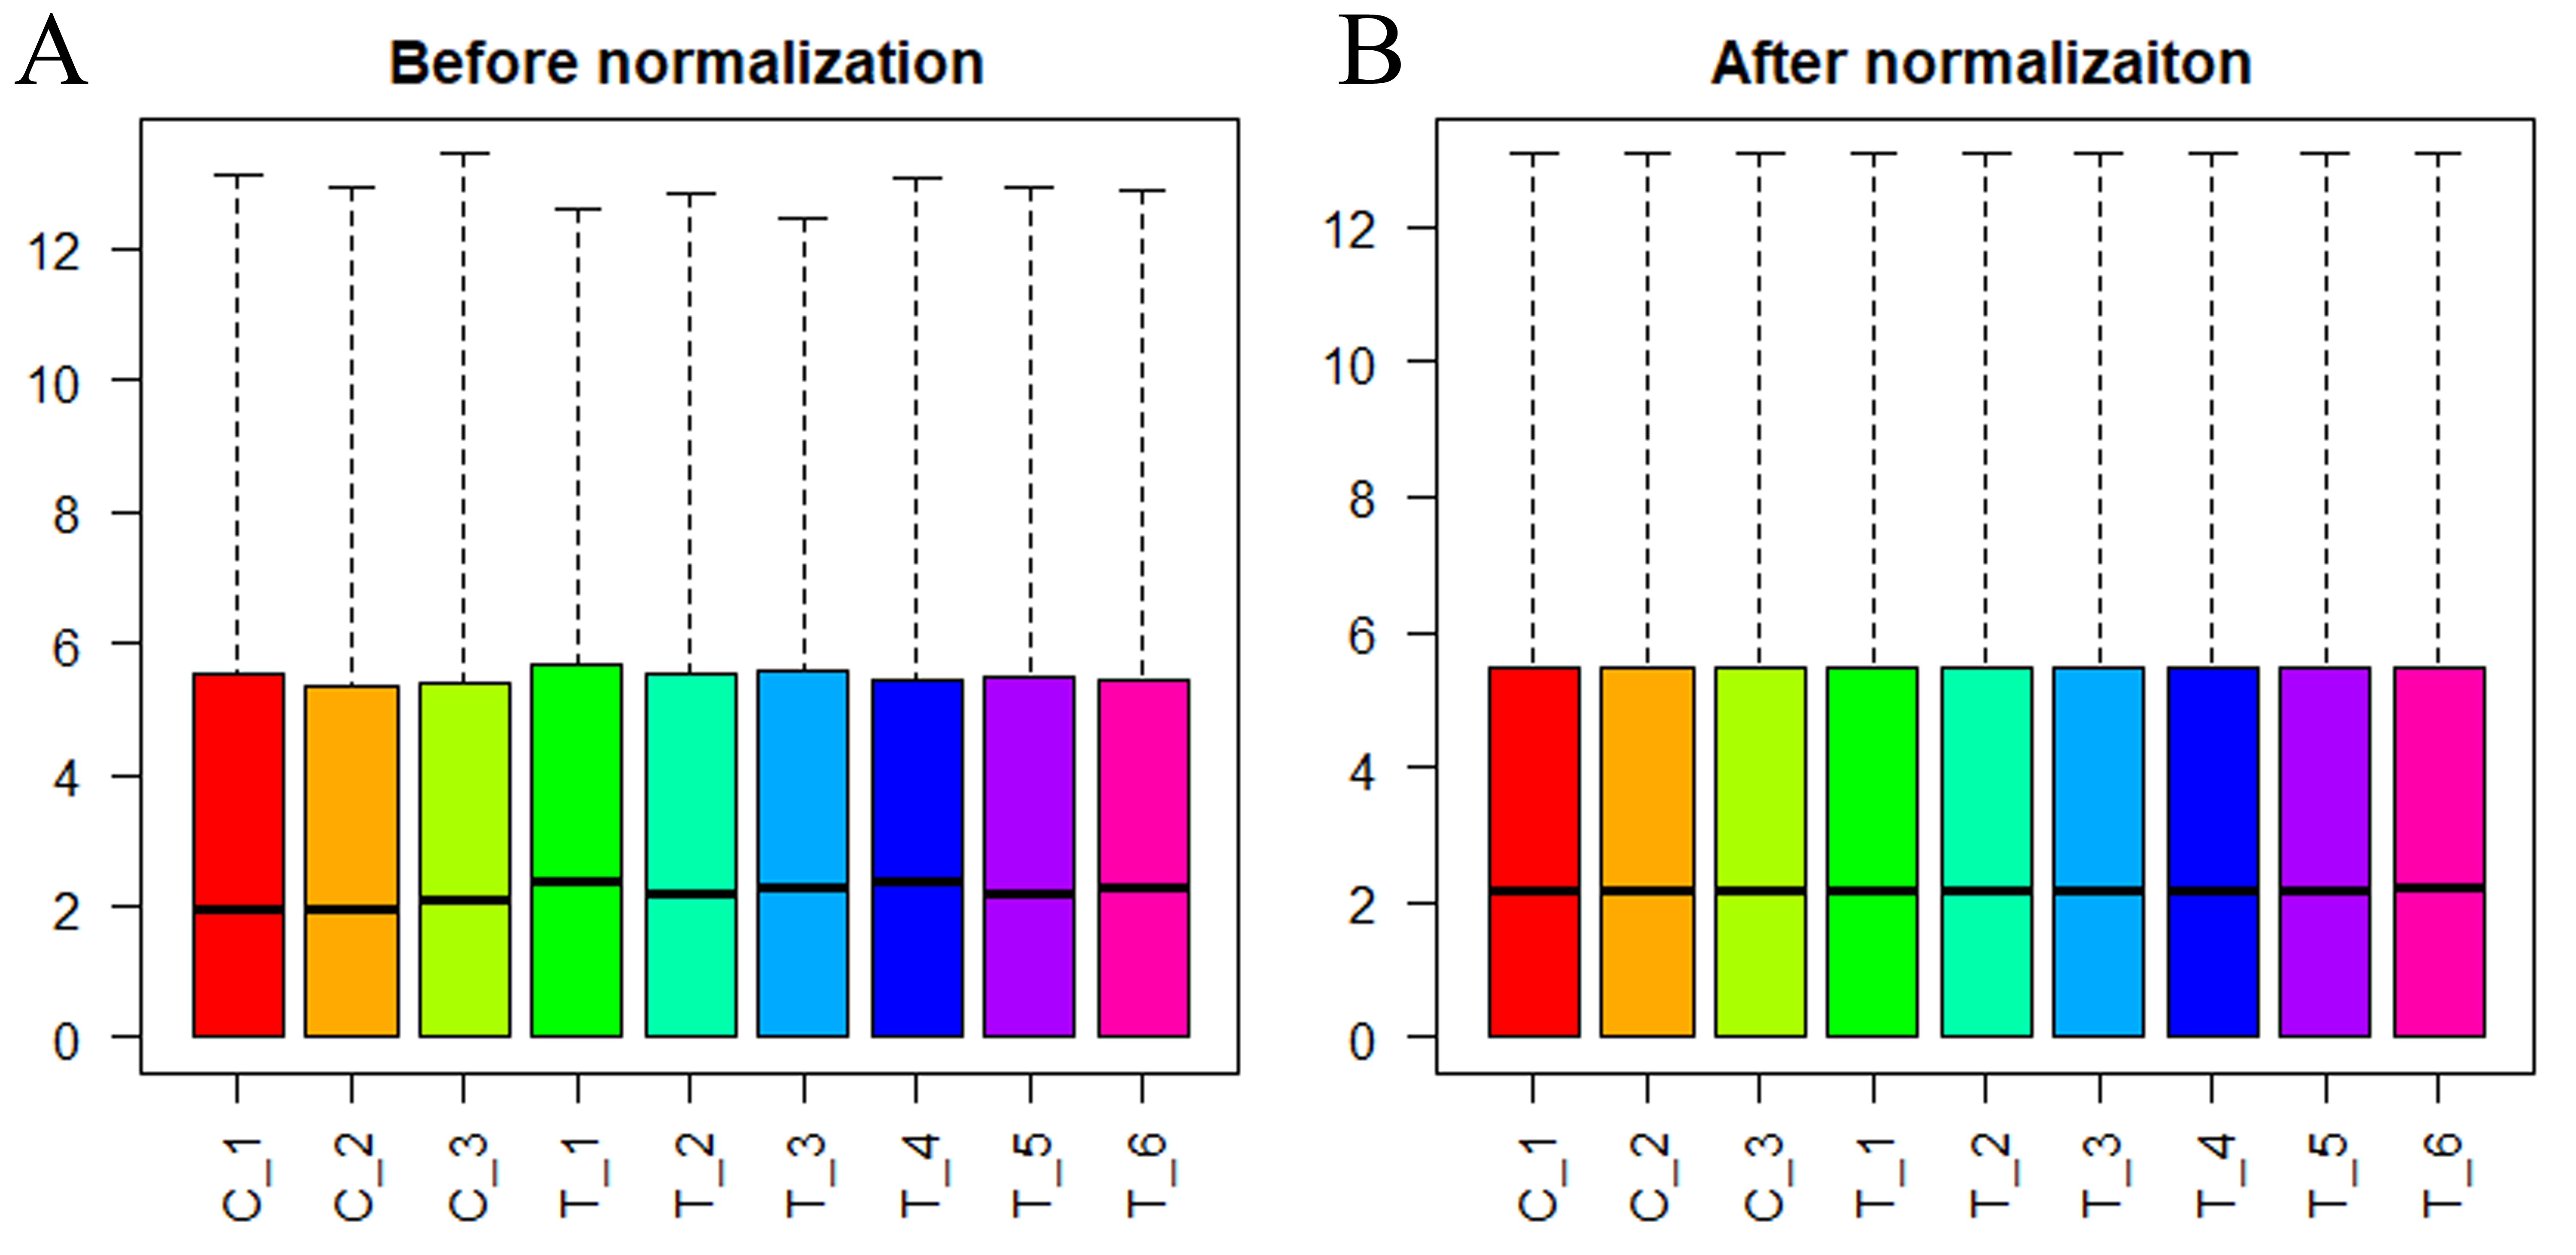
**

**Figure S1.** The distribution of expression of all samples before and after normalization. (A)The distribution of expression of all samples before normalization. (B) The distribution of expression of all samples after normalization.

**
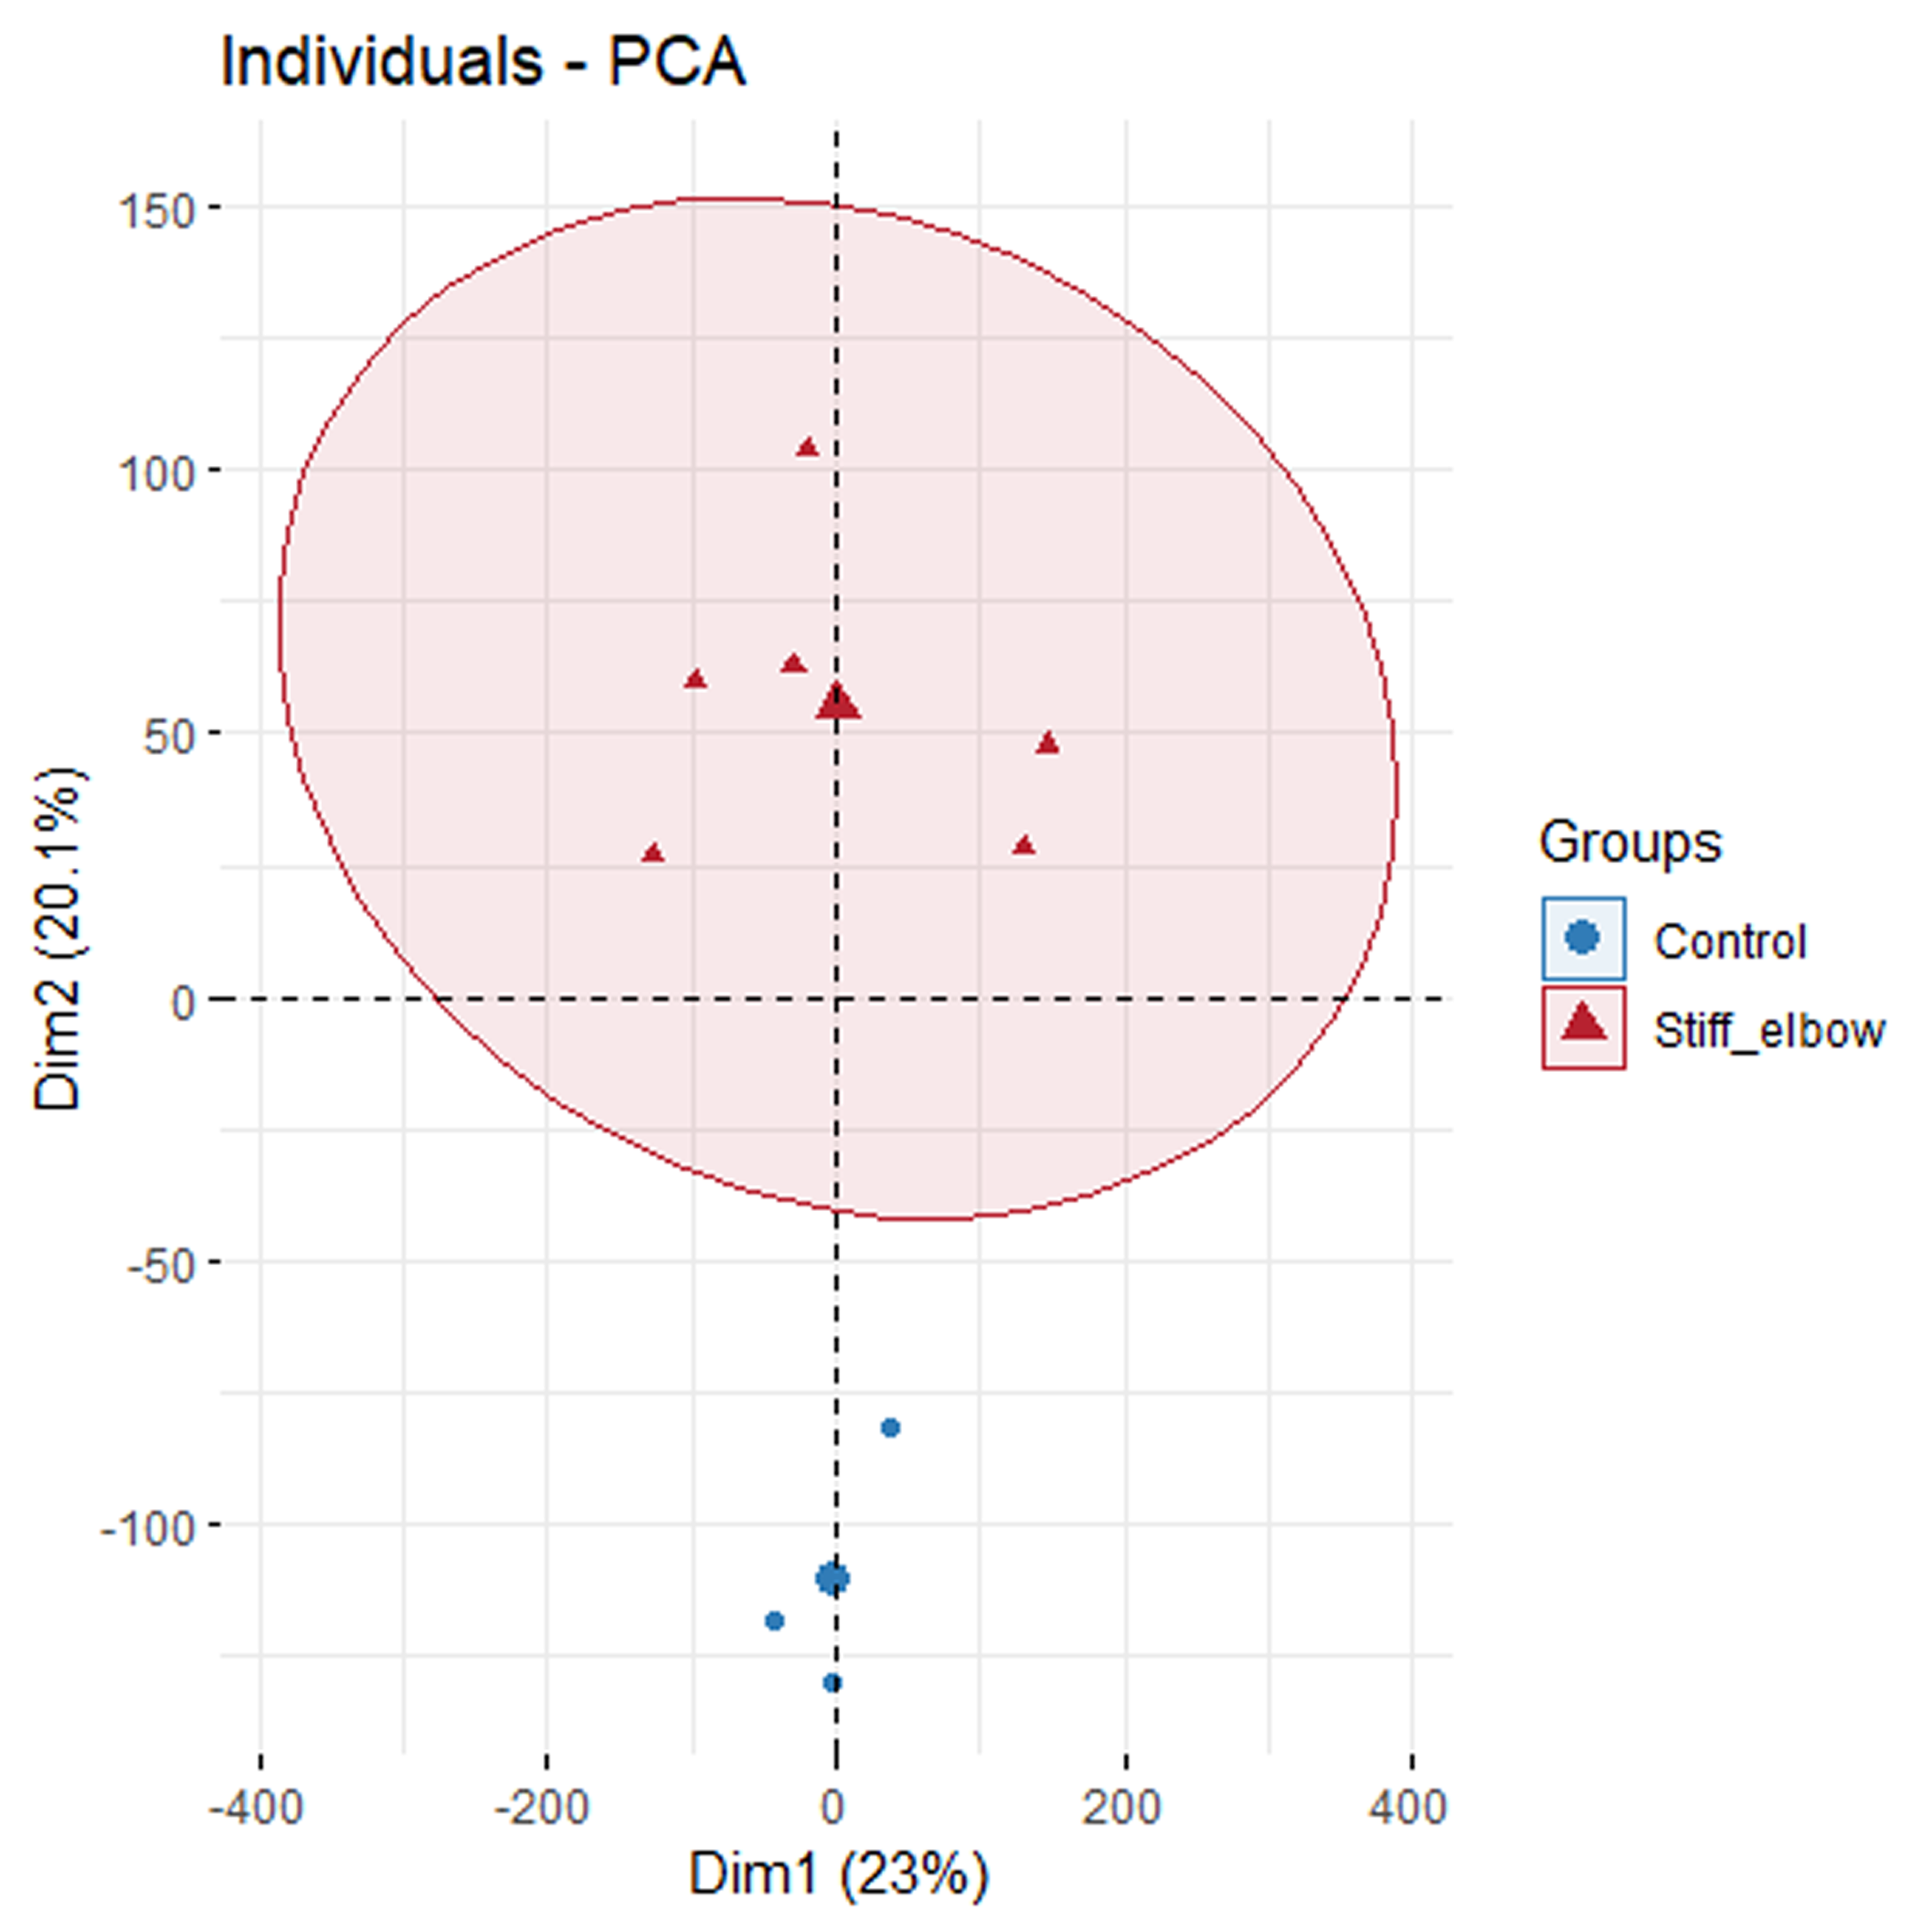
**

**Figure S2.** The distribution of expression of samples involving principal component analysis (PCA) for confirming biological variability between different samples.

**
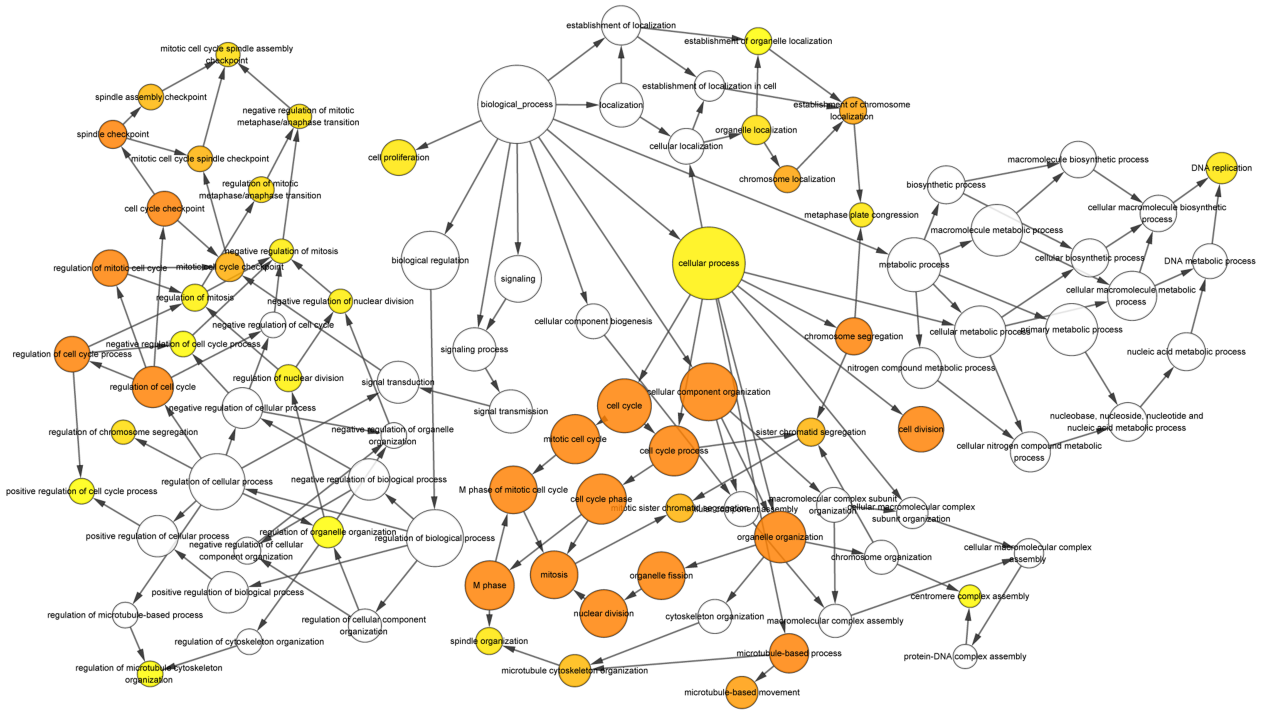
**

**Figure S3.** Biological process analysis of the top 10 differentially expressed genes was constructed using BiNGO of contracted capsules compared with control group. The color depth of nodes refers to the corrected p-value of ontologies. The size of nodes refers to the number of genes that are involved in the ontologies. p < 0.001 was considered statistically significant.
